# Supplementary material for: Comparative study of two standard-free approaches in laser-induced breakdown spectroscopy as applied to the quantitative analysis of aluminum alloy standards under vacuum conditions
Source: Royal Society of Chemistry journal article supplement (doi:10.1039/b820494b), 2009-01-01
Supplement: b820494b.pdf [file b820494b.pdf]

**Comparative study of two standard-free approaches in laser-induced  
breakdown spectroscopy as applied to the quantitative analysis of aluminum  
alloy standards under vacuum conditions**

**Kathleen K. Herrera<sup>a</sup>, Elisabetta Tognoni<sup>b</sup>, Igor B. Gornushkin<sup>c</sup>, Nicolás Omenetto<sup>a, \*</sup>,  
Benjamin W. Smith<sup>a</sup> and J.D. Winefordner<sup>a</sup>**

Table 1. List of spectral lines used in the CF-LIBS analysis of Al alloy B8.

|    |    |         |    |    |         |    |    |         |
|----|----|---------|----|----|---------|----|----|---------|
| Al | I  | 236.705 | Fe | II | 262.567 | Mn | I  | 405.893 |
| Al | I  | 256.798 | Fe | II | 273.955 | Ni | II | 230.300 |
| Al | I  | 265.248 | Fe | II | 274.320 | Ni | II | 239.452 |
| Al | I  | 266.039 | Fe | II | 274.648 | Ni | I  | 300.249 |
| Al | II | 281.619 | Fe | II | 275.329 | Ni | I  | 341.476 |
| Al | I  | 305.468 | Fe | II | 275.573 | Ni | I  | 343.356 |
| Al | I  | 305.714 | Fe | I  | 296.689 | Ni | I  | 345.847 |
| Al | I  | 306.429 | Fe | I  | 298.357 | Ni | I  | 346.165 |
| Al | I  | 306.614 | Fe | I  | 364.784 | Ni | I  | 351.505 |
| Al | II | 466.305 | Fe | I  | 371.993 | Ni | I  | 352.454 |
| Al | II | 622.618 | Fe | I  | 373.486 | Ni | I  | 361.939 |
| Al | II | 623.178 | Fe | I  | 373.713 | Si | I  | 250.690 |
| Al | II | 624.336 | Fe | I  | 374.556 | Si | I  | 251.432 |
| Cr | II | 283.563 | Fe | I  | 374.948 | Si | I  | 251.611 |
| Cr | II | 284.325 | Fe | I  | 375.823 | Si | I  | 251.920 |
| Cr | II | 284.984 | Fe | I  | 376.378 | Si | I  | 252.411 |
| Cr | II | 297.191 | Fe | I  | 376.719 | Si | I  | 252.851 |
| Cr | II | 297.974 | Fe | I  | 382.042 | Si | I  | 288.158 |
| Cr | I  | 357.869 | Fe | I  | 385.991 | Si | II | 385.602 |
| Cr | I  | 359.349 | Fe | I  | 404.581 | Si | II | 386.259 |
| Cr | I  | 360.533 | Fe | I  | 406.359 | Si | I  | 390.552 |
| Cr | I  | 520.604 | Fe | I  | 407.173 | Si | II | 412.807 |
| Cr | I  | 520.844 | Fe | I  | 432.576 | Si | II | 505.598 |
| Cu | II | 221.027 | Fe | I  | 438.354 | Ti | II | 323.452 |
| Cu | II | 221.810 | Mg | II | 279.078 | Ti | II | 332.294 |
| Cu | II | 222.886 | Mg | II | 279.800 | Ti | II | 332.946 |
| Cu | II | 224.261 | Mg | I  | 285.213 | Ti | II | 333.520 |
| Cu | II | 224.700 | Mn | II | 259.373 | Ti | II | 334.034 |
| Cu | II | 227.625 | Mn | II | 260.569 | Ti | II | 334.941 |
| Cu | II | 229.436 | Mn | II | 261.020 | Ti | I  | 335.464 |
| Cu | II | 240.012 | Mn | II | 293.306 | Ti | II | 336.121 |
| Cu | I  | 261.837 | Mn | II | 293.930 | Ti | II | 337.280 |
| Cu | I  | 427.511 | Mn | II | 294.920 | Ti | I  | 363.546 |
| Cu | I  | 510.554 | Mn | II | 344.199 | Ti | I  | 365.350 |
| Fe | II | 238.204 | Mn | II | 348.291 | Ti | II | 375.930 |
| Fe | II | 256.253 | Mn | I  | 356.949 | Ti | II | 376.132 |
| Fe | II | 258.588 | Mn | I  | 380.672 | Ti | I  | 498.173 |
| Fe | II | 259.837 | Mn | I  | 403.076 | Ti | I  | 499.107 |
| Fe | II | 259.940 | Mn | I  | 403.307 | Ti | I  | 499.951 |
| Fe | II | 260.709 | Mn | I  | 403.449 | Ti | I  | 500.721 |
| Fe | II | 261.187 | Mn | I  | 403.573 | Ti | I  | 501.424 |
| Fe | II | 261.382 | Mn | I  | 404.136 |    |    |         |

Table 2. List of spectral lines used in the CF-LIBS analysis of Al alloy D33.

|    |    |         |    |    |         |    |    |         |    |    |         |
|----|----|---------|----|----|---------|----|----|---------|----|----|---------|
| Al | I  | 232.156 | Fe | II | 261.187 | Fe | I  | 404.581 | Ni | I  | 300.249 |
| Al | I  | 256.798 | Fe | II | 261.382 | Fe | I  | 406.359 | Ni | I  | 300.363 |
| Al | I  | 265.248 | Fe | II | 261.762 | Fe | I  | 407.173 | Ni | I  | 301.200 |
| Al | I  | 266.039 | Fe | II | 262.167 | Fe | I  | 427.175 | Ni | I  | 313.411 |
| Al | II | 281.619 | Fe | II | 262.567 | Fe | I  | 430.790 | Ni | I  | 339.105 |
| Al | I  | 305.007 | Fe | II | 262.829 | Fe | I  | 432.576 | Ni | I  | 339.299 |
| Al | I  | 305.468 | Fe | II | 272.754 | Fe | I  | 438.354 | Ni | I  | 341.476 |
| Al | I  | 305.714 | Fe | II | 273.697 | Fe | I  | 440.475 | Ni | I  | 342.371 |
| Al | I  | 306.429 | Fe | II | 273.955 | Mg | II | 279.078 | Ni | I  | 343.356 |
| Al | I  | 306.614 | Fe | I  | 274.240 | Mg | II | 279.553 | Ni | I  | 343.728 |
| Al | II | 466.305 | Fe | II | 274.320 | Mg | II | 279.800 | Ni | I  | 344.626 |
| Al | II | 622.621 | Fe | II | 274.648 | Mg | II | 280.270 | Ni | I  | 345.289 |
| Al | II | 623.175 | Fe | II | 274.932 | Mg | I  | 285.213 | Ni | I  | 345.847 |
| Al | II | 624.337 | Fe | II | 275.329 | Mn | II | 259.373 | Ni | I  | 346.165 |
| Cr | II | 297.974 | Fe | II | 275.573 | Mn | II | 260.569 | Ni | I  | 349.296 |
| Cr | II | 342.273 | Fe | I  | 296.689 | Mn | II | 261.814 | Ni | I  | 351.505 |
| Cr | I  | 427.480 | Fe | I  | 297.313 | Mn | I  | 280.106 | Ni | I  | 352.454 |
| Cu | II | 224.261 | Fe | I  | 298.357 | Mn | II | 293.305 | Ni | I  | 356.637 |
| Cu | II | 224.700 | Fe | II | 298.482 | Mn | II | 293.931 | Si | I  | 250.690 |
| Cu | II | 227.625 | Fe | I  | 299.442 | Mn | II | 294.921 | Si | I  | 251.432 |
| Cu | I  | 296.116 | Fe | I  | 300.094 | Mn | II | 344.199 | Si | I  | 251.611 |
| Cu | I  | 301.084 | Fe | I  | 300.814 | Mn | II | 346.032 | Si | I  | 251.920 |
| Cu | I  | 510.554 | Fe | I  | 300.956 | Mn | I  | 403.076 | Si | I  | 252.411 |
| Fe | II | 233.131 | Fe | I  | 302.063 | Mn | I  | 403.307 | Si | I  | 252.851 |
| Fe | II | 233.280 | Fe | I  | 346.586 | Mn | I  | 403.449 | Si | I  | 288.158 |
| Fe | II | 233.801 | Fe | I  | 349.057 | Mn | I  | 403.573 | Si | I  | 298.764 |
| Fe | II | 234.349 | Fe | I  | 351.381 | Mn | I  | 404.136 | Si | II | 385.367 |
| Fe | II | 234.428 | Fe | I  | 356.537 | Mn | I  | 404.876 | Si | II | 385.602 |
| Fe | II | 234.830 | Fe | I  | 357.009 | Mn | I  | 405.554 | Si | II | 386.259 |
| Fe | II | 238.204 | Fe | I  | 358.119 | Ni | II | 220.672 | Si | I  | 390.552 |
| Fe | II | 238.863 | Fe | I  | 361.876 | Ni | II | 221.648 | Si | II | 412.807 |
| Fe | II | 239.563 | Fe | I  | 363.146 | Ni | II | 222.296 | Ti | II | 323.452 |
| Fe | II | 239.924 | Fe | I  | 364.784 | Ni | II | 225.385 | Ti | II | 323.658 |
| Fe | II | 240.489 | Fe | I  | 368.745 | Ni | II | 226.446 | Ti | II | 323.904 |
| Fe | II | 240.666 | Fe | I  | 371.993 | Ni | II | 227.021 | Ti | II | 323.966 |
| Fe | II | 241.052 | Fe | I  | 373.486 | Ni | II | 227.877 | Ti | II | 334.941 |
| Fe | II | 241.107 | Fe | I  | 373.713 | Ni | II | 229.655 | Ti | II | 336.122 |
| Fe | II | 241.331 | Fe | I  | 374.556 | Ni | II | 229.714 | Ti | II | 338.376 |
| Fe | II | 243.930 | Fe | I  | 374.826 | Ni | II | 230.300 | Ti | II | 338.785 |
| Fe | II | 256.253 | Fe | I  | 374.948 | Ni | II | 231.604 | Ti | II | 339.458 |
| Fe | II | 256.348 | Fe | I  | 375.823 | Ni | I  | 232.003 | Ti | II | 350.490 |
| Fe | II | 258.588 | Fe | I  | 376.378 | Ni | II | 233.458 | Ti | I  | 363.546 |
| Fe | II | 259.154 | Fe | I  | 382.042 | Ni | II | 239.452 | Ti | I  | 364.268 |
| Fe | II | 259.837 | Fe | I  | 382.588 | Ni | II | 241.613 | Ti | II | 368.520 |
| Fe | II | 259.940 | Fe | I  | 382.782 | Ni | II | 243.789 | Ti | II | 376.132 |
| Fe | II | 260.709 | Fe | I  | 385.991 | Ni | I  | 298.165 |    |    |         |

Table 3. List of spectral lines used in the CF-LIBS analysis of Al alloy S4.

|    |    |         |    |    |         |    |    |         |    |    |         |
|----|----|---------|----|----|---------|----|----|---------|----|----|---------|
| Al | I  | 226.910 | Fe | II | 239.562 | Fe | I  | 374.826 | Mn | I  | 405.554 |
| Al | I  | 236.705 | Fe | II | 239.924 | Fe | I  | 374.948 | Ni | I  | 300.249 |
| Al | I  | 237.312 | Fe | II | 240.488 | Fe | I  | 375.823 | Ni | I  | 336.957 |
| Al | I  | 237.840 | Fe | II | 240.666 | Fe | I  | 376.378 | Ni | I  | 338.057 |
| Al | I  | 256.798 | Fe | II | 241.052 | Fe | I  | 376.554 | Ni | I  | 339.299 |
| Al | I  | 257.510 | Fe | II | 241.331 | Fe | I  | 376.719 | Ni | I  | 341.476 |
| Al | I  | 265.248 | Fe | II | 249.326 | Fe | I  | 382.042 | Ni | I  | 344.626 |
| Al | I  | 266.039 | Fe | II | 256.253 | Fe | I  | 385.991 | Ni | I  | 345.847 |
| Al | I  | 305.007 | Fe | II | 256.348 | Fe | I  | 388.628 | Ni | I  | 346.165 |
| Al | I  | 305.468 | Fe | II | 258.588 | Fe | I  | 404.581 | Ni | I  | 351.505 |
| Al | I  | 305.714 | Fe | II | 259.837 | Fe | I  | 406.359 | Ni | I  | 352.454 |
| Al | I  | 306.429 | Fe | II | 259.940 | Fe | I  | 407.173 | Si | I  | 250.690 |
| Al | I  | 306.614 | Fe | II | 260.709 | Fe | I  | 427.175 | Si | I  | 251.432 |
| Al | II | 466.305 | Fe | II | 261.187 | Fe | I  | 430.790 | Si | I  | 251.611 |
| Al | II | 622.621 | Fe | II | 261.382 | Fe | I  | 432.576 | Si | I  | 251.920 |
| Al | II | 623.175 | Fe | II | 261.762 | Fe | I  | 438.354 | Si | I  | 252.411 |
| Al | II | 624.337 | Fe | II | 262.567 | Fe | I  | 440.475 | Si | I  | 252.851 |
| Cr | II | 283.563 | Fe | II | 262.829 | Fe | I  | 441.512 | Si | I  | 288.158 |
| Cr | II | 284.325 | Fe | II | 271.441 | Mg | I  | 277.669 | Si | II | 385.602 |
| Cr | II | 284.984 | Fe | I  | 271.902 | Mg | I  | 277.827 | Si | I  | 390.552 |
| Cr | II | 285.568 | Fe | II | 272.754 | Mg | I  | 278.142 | Si | II | 412.807 |
| Cr | I  | 300.089 | Fe | II | 273.697 | Mg | I  | 278.297 | Ti | II | 323.452 |
| Cr | II | 313.206 | Fe | II | 273.955 | Mg | II | 279.078 | Ti | II | 323.657 |
| Cr | I  | 360.533 | Fe | II | 274.320 | Mg | II | 279.553 | Ti | II | 323.904 |
| Cr | I  | 425.433 | Fe | II | 274.648 | Mg | II | 279.800 | Ti | II | 324.199 |
| Cr | I  | 427.480 | Fe | II | 275.329 | Mg | II | 280.270 | Ti | II | 332.294 |
| Cr | I  | 428.972 | Fe | II | 275.574 | Mg | I  | 285.213 | Ti | II | 334.941 |
| Cu | II | 221.027 | Fe | II | 278.369 | Mg | II | 292.863 | Ti | II | 336.121 |
| Cu | II | 221.810 | Fe | I  | 296.689 | Mg | II | 293.651 | Ti | II | 337.280 |
| Cu | II | 222.886 | Fe | I  | 297.313 | Mn | II | 257.610 | Ti | II | 338.376 |
| Cu | II | 224.261 | Fe | I  | 298.357 | Mn | II | 259.373 | Ti | II | 338.784 |
| Cu | II | 224.700 | Fe | I  | 299.442 | Mn | II | 260.569 | Ti | II | 339.458 |
| Cu | II | 227.625 | Fe | I  | 302.063 | Mn | II | 261.020 | Ti | I  | 363.546 |
| Cu | II | 229.436 | Fe | I  | 344.060 | Mn | I  | 280.106 | Ti | I  | 364.268 |
| Cu | II | 240.333 | Fe | I  | 346.586 | Mn | II | 293.306 | Ti | I  | 365.350 |
| Cu | I  | 276.637 | Fe | I  | 356.537 | Mn | II | 293.930 | Ti | II | 368.520 |
| Cu | I  | 296.116 | Fe | I  | 357.009 | Mn | II | 294.920 | Ti | II | 375.930 |
| Cu | I  | 327.396 | Fe | I  | 360.885 | Mn | II | 344.199 | Zn | II | 250.199 |
| Cu | I  | 510.554 | Fe | I  | 361.876 | Mn | II | 346.033 | Zn | II | 255.795 |
| Fe | II | 233.131 | Fe | I  | 363.146 | Mn | I  | 380.672 | Zn | I  | 328.233 |
| Fe | II | 233.280 | Fe | I  | 364.784 | Mn | I  | 403.076 | Zn | I  | 330.258 |
| Fe | II | 233.801 | Fe | I  | 371.993 | Mn | I  | 403.307 | Zn | I  | 334.502 |
| Fe | II | 234.349 | Fe | I  | 372.761 | Mn | I  | 403.449 | Zn | I  | 468.014 |
| Fe | II | 234.830 | Fe | I  | 373.486 | Mn | I  | 403.573 | Zn | I  | 472.215 |
| Fe | II | 238.204 | Fe | I  | 373.713 | Mn | I  | 404.136 | Zn | I  | 481.053 |
| Fe | II | 238.863 | Fe | I  | 374.556 | Mn | I  | 404.876 | Zn | II | 491.162 |

Table 4. List of spectral lines used in the CF-LIBS analysis of Al alloy SM10.

|    |    |         |    |    |         |    |    |         |    |    |         |
|----|----|---------|----|----|---------|----|----|---------|----|----|---------|
| Al | I  | 226.910 | Fe | II | 234.349 | Fe | I  | 357.009 | Mn | II | 293.930 |
| Al | I  | 236.705 | Fe | II | 234.428 | Fe | I  | 358.119 | Mn | II | 294.920 |
| Al | I  | 237.207 | Fe | II | 234.830 | Fe | I  | 360.668 | Mn | II | 344.199 |
| Al | I  | 237.312 | Fe | II | 238.204 | Fe | I  | 360.885 | Mn | II | 346.033 |
| Al | I  | 265.248 | Fe | II | 238.863 | Fe | I  | 361.876 | Mn | I  | 380.672 |
| Al | I  | 266.039 | Fe | II | 239.562 | Fe | I  | 363.146 | Mn | I  | 403.076 |
| Al | II | 281.619 | Fe | II | 239.924 | Fe | I  | 364.784 | Mn | I  | 403.307 |
| Al | I  | 305.007 | Fe | II | 240.488 | Fe | I  | 371.993 | Mn | I  | 403.449 |
| Al | I  | 305.468 | Fe | II | 240.666 | Fe | I  | 372.761 | Mn | I  | 403.573 |
| Al | I  | 305.714 | Fe | II | 241.052 | Fe | I  | 373.486 | Mn | I  | 404.136 |
| Al | I  | 306.429 | Fe | II | 241.107 | Fe | I  | 373.713 | Mn | I  | 404.876 |
| Al | I  | 306.614 | Fe | II | 241.331 | Fe | I  | 374.556 | Mn | I  | 405.554 |
| Al | II | 466.305 | Fe | I  | 252.284 | Fe | I  | 374.826 | Ni | II | 221.648 |
| Al | II | 622.621 | Fe | II | 256.253 | Fe | I  | 374.948 | Ni | I  | 300.249 |
| Al | II | 623.175 | Fe | II | 256.348 | Fe | I  | 375.823 | Ni | I  | 344.626 |
| Al | II | 624.337 | Fe | II | 258.588 | Fe | I  | 376.378 | Si | I  | 250.690 |
| Cr | II | 283.563 | Fe | II | 259.154 | Fe | I  | 376.554 | Si | I  | 251.432 |
| Cr | II | 284.325 | Fe | II | 259.837 | Fe | I  | 376.719 | Si | I  | 251.611 |
| Cr | II | 284.984 | Fe | II | 259.940 | Fe | I  | 381.584 | Si | I  | 251.920 |
| Cr | II | 285.568 | Fe | II | 260.709 | Fe | I  | 382.042 | Si | I  | 252.411 |
| Cr | II | 297.974 | Fe | II | 261.187 | Fe | I  | 385.991 | Si | I  | 252.851 |
| Cr | I  | 300.089 | Fe | II | 261.382 | Fe | I  | 404.581 | Si | I  | 288.158 |
| Cr | II | 313.206 | Fe | II | 261.762 | Fe | I  | 406.359 | Si | II | 385.602 |
| Cr | I  | 357.869 | Fe | II | 262.567 | Fe | I  | 407.173 | Si | II | 386.259 |
| Cr | I  | 359.349 | Fe | II | 262.829 | Fe | I  | 427.175 | Si | I  | 390.552 |
| Cr | I  | 360.533 | Fe | II | 271.441 | Fe | I  | 430.790 | Si | II | 412.807 |
| Cr | I  | 425.433 | Fe | I  | 271.902 | Fe | I  | 432.576 | Ti | II | 323.452 |
| Cr | I  | 427.480 | Fe | II | 272.754 | Fe | I  | 438.354 | Ti | II | 323.657 |
| Cr | I  | 428.972 | Fe | II | 273.697 | Fe | I  | 440.475 | Ti | II | 323.904 |
| Cu | II | 221.027 | Fe | II | 273.955 | Fe | I  | 441.512 | Ti | II | 324.199 |
| Cu | II | 221.810 | Fe | II | 274.320 | Mg | I  | 277.669 | Ti | II | 336.121 |
| Cu | II | 222.886 | Fe | II | 274.648 | Mg | I  | 277.827 | Ti | II | 337.280 |
| Cu | II | 224.261 | Fe | II | 275.329 | Mg | I  | 278.142 | Ti | II | 338.376 |
| Cu | II | 224.700 | Fe | II | 275.574 | Mg | I  | 278.297 | Ti | II | 368.520 |
| Cu | II | 227.625 | Fe | II | 278.369 | Mg | II | 279.078 | Ti | II | 375.930 |
| Cu | II | 229.436 | Fe | I  | 294.787 | Mg | II | 279.800 | Ti | II | 376.132 |
| Cu | II | 240.012 | Fe | I  | 298.357 | Mg | II | 280.270 | Zn | II | 250.199 |
| Cu | I  | 330.795 | Fe | I  | 299.442 | Mg | II | 292.863 | Zn | II | 255.795 |
| Cu | I  | 465.112 | Fe | I  | 302.063 | Mg | II | 293.651 | Zn | I  | 328.233 |
| Cu | I  | 510.554 | Fe | I  | 305.908 | Mn | II | 259.373 | Zn | I  | 334.502 |
| Fe | II | 233.131 | Fe | I  | 344.060 | Mn | II | 260.569 | Zn | I  | 472.215 |
| Fe | II | 233.280 | Fe | I  | 346.586 | Mn | II | 261.020 | Zn | I  | 481.053 |
| Fe | II | 233.801 | Fe | I  | 356.537 | Mn | II | 293.306 |    |    |         |

Table 5. List of spectral lines used in the CF-LIBS analysis of Al alloy V14.

|    |    |         |    |    |         |    |    |         |    |    |         |
|----|----|---------|----|----|---------|----|----|---------|----|----|---------|
| Al | I  | 231.249 | Fe | II | 241.052 | Fe | I  | 382.043 | Ni | I  | 349.296 |
| Al | I  | 232.156 | Fe | II | 241.107 | Fe | I  | 382.588 | Ni | I  | 351.505 |
| Al | I  | 236.705 | Fe | II | 241.331 | Fe | I  | 382.782 | Ni | I  | 352.454 |
| Al | I  | 237.312 | Fe | II | 242.836 | Fe | I  | 383.422 | Ni | I  | 356.637 |
| Al | I  | 256.798 | Fe | II | 243.930 | Fe | I  | 385.991 | Ni | I  | 361.939 |
| Al | I  | 265.248 | Fe | I  | 247.977 | Fe | I  | 407.173 | Si | I  | 221.089 |
| Al | I  | 266.039 | Fe | I  | 248.814 | Fe | I  | 427.175 | Si | I  | 243.515 |
| Al | II | 281.619 | Fe | II | 249.326 | Fe | I  | 430.790 | Si | I  | 250.690 |
| Al | I  | 305.007 | Fe | I  | 251.083 | Fe | I  | 432.576 | Si | I  | 251.432 |
| Al | I  | 305.468 | Fe | I  | 252.743 | Fe | I  | 438.354 | Si | I  | 251.611 |
| Al | I  | 305.714 | Fe | II | 256.253 | Fe | I  | 440.475 | Si | I  | 251.920 |
| Al | I  | 306.429 | Fe | II | 256.348 | Mg | II | 279.078 | Si | I  | 252.411 |
| Al | I  | 306.614 | Fe | II | 258.588 | Mg | II | 279.553 | Si | I  | 252.851 |
| Al | II | 466.305 | Fe | II | 259.837 | Mg | II | 279.800 | Si | I  | 288.158 |
| Cr | II | 266.602 | Fe | II | 259.940 | Mg | II | 280.270 | Si | II | 385.367 |
| Cr | II | 267.181 | Fe | II | 260.709 | Mg | I  | 285.213 | Si | II | 385.602 |
| Cr | II | 283.563 | Fe | II | 261.187 | Mn | II | 257.610 | Si | II | 386.260 |
| Cr | II | 284.325 | Fe | II | 261.382 | Mn | II | 259.373 | Si | I  | 390.552 |
| Cr | II | 284.984 | Fe | II | 261.762 | Mn | II | 260.569 | Si | II | 412.805 |
| Cr | II | 285.568 | Fe | II | 262.567 | Mn | II | 261.020 | Ti | II | 323.452 |
| Cr | II | 297.974 | Fe | II | 262.829 | Mn | II | 261.814 | Ti | II | 323.658 |
| Cr | II | 313.206 | Fe | II | 266.466 | Mn | I  | 280.106 | Ti | II | 323.904 |
| Cr | I  | 357.869 | Fe | II | 272.754 | Mn | II | 293.306 | Ti | II | 324.199 |
| Cr | I  | 359.349 | Fe | II | 273.697 | Mn | II | 293.931 | Ti | II | 328.766 |
| Cr | I  | 360.533 | Fe | II | 273.955 | Mn | II | 294.921 | Ti | II | 332.294 |
| Cr | I  | 425.433 | Fe | II | 274.320 | Mn | II | 344.199 | Ti | II | 333.520 |
| Cr | I  | 427.480 | Fe | II | 274.648 | Mn | II | 346.032 | Ti | II | 334.036 |
| Cr | I  | 428.972 | Fe | II | 274.932 | Mn | II | 347.413 | Ti | II | 334.941 |
| Cu | II | 221.027 | Fe | II | 275.329 | Mn | II | 348.868 | Ti | II | 336.122 |
| Cu | II | 221.810 | Fe | II | 275.573 | Mn | II | 349.584 | Ti | II | 337.280 |
| Cu | II | 222.886 | Fe | I  | 295.394 | Mn | II | 349.753 | Ti | II | 338.377 |
| Cu | II | 224.261 | Fe | I  | 298.357 | Mn | I  | 403.076 | Ti | II | 338.785 |
| Cu | II | 224.700 | Fe | II | 298.482 | Mn | I  | 403.307 | Ti | II | 339.458 |
| Cu | II | 227.625 | Fe | II | 298.554 | Mn | I  | 403.449 | Ti | II | 344.431 |
| Cu | II | 229.436 | Fe | I  | 356.537 | Mn | I  | 403.573 | Ti | II | 350.490 |
| Cu | I  | 296.116 | Fe | I  | 357.009 | Mn | I  | 404.136 | Ti | I  | 363.546 |
| Cu | I  | 510.554 | Fe | I  | 358.119 | Ni | II | 220.672 | Ti | I  | 364.268 |
| Cu | I  | 578.213 | Fe | I  | 360.885 | Ni | II | 221.648 | Ti | I  | 365.350 |
| Fe | II | 233.131 | Fe | I  | 361.876 | Ni | II | 227.877 | Ti | II | 368.520 |
| Fe | II | 233.280 | Fe | I  | 363.146 | Ni | II | 230.300 | Ti | II | 374.164 |
| Fe | II | 233.801 | Fe | I  | 364.784 | Ni | II | 231.604 | Ti | II | 375.930 |
| Fe | II | 234.349 | Fe | I  | 371.993 | Ni | II | 239.452 | Ti | II | 376.132 |
| Fe | II | 234.428 | Fe | I  | 373.486 | Ni | II | 241.613 | Ti | II | 454.962 |
| Fe | II | 234.830 | Fe | I  | 373.713 | Ni | I  | 313.411 | Ti | II | 457.198 |
| Fe | II | 236.483 | Fe | I  | 374.556 | Ni | I  | 338.057 | Ti | I  | 498.173 |
| Fe | II | 238.204 | Fe | I  | 374.826 | Ni | I  | 339.299 | Ti | I  | 499.107 |
| Fe | II | 238.863 | Fe | I  | 374.948 | Ni | I  | 341.476 | Ti | I  | 499.951 |
| Fe | II | 239.563 | Fe | I  | 375.823 | Ni | I  | 343.356 | Ti | I  | 500.721 |
| Fe | II | 239.924 | Fe | I  | 376.378 | Ni | I  | 344.626 |    |    |         |
| Fe | II | 240.489 | Fe | I  | 376.719 | Ni | I  | 345.847 |    |    |         |
| Fe | II | 240.666 | Fe | I  | 381.584 | Ni | I  | 346.165 |    |    |         |

Table 6. List of spectral lines used in the CF-LIBS analysis of Al alloy Z8.

|    |    |         |    |    |         |    |    |         |
|----|----|---------|----|----|---------|----|----|---------|
| Al | I  | 231.906 | Cu | I  | 296.116 | Fe | II | 261.187 |
| Al | I  | 232.156 | Cu | I  | 301.084 | Fe | II | 261.382 |
| Al | I  | 256.798 | Cu | I  | 319.410 | Fe | II | 261.762 |
| Al | I  | 265.248 | Cu | I  | 328.271 | Fe | II | 262.167 |
| Al | I  | 266.039 | Cu | I  | 329.054 | Fe | II | 262.567 |
| Al | II | 281.619 | Cu | I  | 333.784 | Fe | II | 262.829 |
| Al | I  | 305.007 | Cu | I  | 465.112 | Fe | II | 266.466 |
| Al | I  | 305.468 | Cu | I  | 510.554 | Fe | II | 271.441 |
| Al | I  | 305.714 | Cu | I  | 529.252 | Fe | I  | 272.090 |
| Al | I  | 306.429 | Cu | I  | 578.213 | Fe | II | 272.754 |
| Al | I  | 306.614 | Fe | II | 233.131 | Fe | II | 273.697 |
| Al | II | 622.621 | Fe | II | 233.280 | Fe | II | 273.955 |
| Al | II | 623.175 | Fe | II | 233.801 | Fe | II | 274.320 |
| Al | II | 624.337 | Fe | II | 234.349 | Fe | II | 274.648 |
| Cr | II | 276.259 | Fe | II | 234.428 | Fe | II | 274.932 |
| Cr | II | 282.238 | Fe | II | 234.830 | Fe | II | 275.329 |
| Cr | II | 283.563 | Fe | II | 238.204 | Fe | II | 275.573 |
| Cr | II | 284.001 | Fe | II | 238.863 | Fe | II | 278.369 |
| Cr | II | 284.325 | Fe | II | 239.563 | Fe | I  | 294.787 |
| Cr | II | 284.984 | Fe | II | 239.924 | Fe | I  | 296.689 |
| Cr | II | 285.568 | Fe | II | 240.489 | Fe | I  | 297.313 |
| Cr | II | 285.890 | Fe | II | 240.666 | Fe | I  | 299.442 |
| Cr | II | 286.257 | Fe | II | 241.052 | Fe | I  | 299.951 |
| Cr | II | 297.190 | Fe | II | 241.107 | Fe | I  | 300.094 |
| Cr | II | 311.865 | Fe | II | 241.331 | Fe | I  | 300.814 |
| Cr | II | 312.036 | Fe | II | 243.930 | Fe | I  | 341.313 |
| Cr | II | 312.869 | Fe | I  | 247.977 | Fe | I  | 356.537 |
| Cr | II | 313.206 | Fe | I  | 248.327 | Fe | I  | 358.119 |
| Cr | II | 313.668 | Fe | I  | 248.814 | Fe | I  | 360.885 |
| Cr | I  | 357.869 | Fe | II | 249.326 | Fe | I  | 361.876 |
| Cr | I  | 359.349 | Fe | I  | 251.083 | Fe | I  | 363.146 |
| Cr | I  | 360.533 | Fe | I  | 252.284 | Fe | I  | 364.784 |
| Cr | I  | 425.433 | Fe | I  | 252.743 | Fe | I  | 375.823 |
| Cr | I  | 427.480 | Fe | II | 253.363 | Fe | I  | 376.378 |
| Cr | I  | 428.972 | Fe | II | 253.442 | Fe | I  | 376.719 |
| Cu | II | 221.027 | Fe | I  | 253.560 | Fe | I  | 381.584 |
| Cu | II | 221.810 | Fe | II | 253.820 | Fe | I  | 382.042 |
| Cu | II | 222.886 | Fe | II | 253.899 | Fe | I  | 385.991 |
| Cu | II | 224.261 | Fe | II | 256.253 | Fe | I  | 404.581 |
| Cu | II | 224.700 | Fe | II | 256.348 | Fe | I  | 406.359 |
| Cu | II | 227.625 | Fe | II | 258.588 | Fe | I  | 407.173 |
| Cu | II | 229.436 | Fe | II | 259.154 | Fe | I  | 427.175 |
| Cu | II | 260.027 | Fe | II | 259.837 | Fe | I  | 430.790 |
| Cu | I  | 282.437 | Fe | II | 260.709 | Fe | I  | 432.576 |

Table 6. Continued.

|    |    |         |    |    |         |    |    |         |
|----|----|---------|----|----|---------|----|----|---------|
| Fe | I  | 438.354 | Ni | II | 231.604 | Ti | II | 322.860 |
| Fe | I  | 440.475 | Ni | I  | 232.003 | Ti | II | 322.860 |
| Mg | I  | 277.669 | Ni | II | 233.458 | Ti | II | 323.452 |
| Mg | I  | 277.827 | Ni | II | 239.452 | Ti | II | 323.658 |
| Mg | I  | 278.142 | Ni | II | 241.613 | Ti | II | 323.904 |
| Mg | I  | 278.297 | Ni | II | 243.789 | Ti | II | 323.966 |
| Mg | II | 279.078 | Ni | I  | 300.249 | Ti | II | 333.520 |
| Mg | II | 279.800 | Ni | I  | 300.363 | Ti | II | 334.036 |
| Mg | I  | 285.213 | Ni | I  | 301.200 | Ti | I  | 334.188 |
| Mg | II | 292.863 | Ni | I  | 313.411 | Ti | II | 334.941 |
| Mg | II | 293.651 | Ni | I  | 338.057 | Ti | II | 336.122 |
| Mg | I  | 382.930 | Ni | I  | 339.105 | Ti | II | 337.280 |
| Mg | I  | 383.230 | Ni | I  | 339.299 | Ti | II | 338.377 |
| Mg | I  | 383.829 | Ni | I  | 341.476 | Ti | II | 338.785 |
| Mg | I  | 516.733 | Ni | I  | 343.356 | Ti | II | 344.431 |
| Mg | I  | 517.268 | Ni | I  | 344.626 | Ti | II | 350.490 |
| Mg | I  | 518.361 | Ni | I  | 345.847 | Ti | II | 362.482 |
| Mn | II | 257.610 | Ni | I  | 346.165 | Ti | I  | 363.546 |
| Mn | II | 259.373 | Ni | I  | 349.296 | Ti | II | 364.133 |
| Mn | II | 260.569 | Ni | I  | 351.505 | Ti | I  | 364.268 |
| Mn | II | 261.020 | Ni | I  | 352.454 | Ti | I  | 365.350 |
| Mn | II | 261.814 | Ni | I  | 356.637 | Ti | II | 368.520 |
| Mn | II | 293.305 | Ni | I  | 361.939 | Ti | II | 374.164 |
| Mn | II | 293.931 | Si | I  | 250.690 | Ti | II | 375.930 |
| Mn | II | 294.921 | Si | I  | 251.432 | Ti | II | 376.132 |
| Mn | I  | 322.809 | Si | I  | 251.611 | Ti | II | 390.055 |
| Mn | II | 344.199 | Si | I  | 251.920 | Ti | II | 391.347 |
| Mn | II | 346.032 | Si | I  | 252.411 | Ti | I  | 398.176 |
| Mn | II | 349.584 | Si | I  | 252.851 | Ti | I  | 398.976 |
| Mn | II | 349.753 | Si | I  | 288.158 | Ti | I  | 399.864 |
| Mn | I  | 380.672 | Si | II | 385.602 | Ti | II | 429.410 |
| Mn | I  | 403.076 | Si | I  | 390.552 | Ti | II | 430.005 |
| Mn | I  | 403.307 | Si | II | 412.805 | Ti | II | 439.503 |
| Mn | I  | 403.449 | Ti | II | 315.226 | Ti | II | 444.379 |
| Mn | I  | 403.573 | Ti | II | 315.421 | Ti | II | 446.850 |
| Mn | I  | 404.136 | Ti | II | 315.568 | Ti | II | 450.127 |
| Mn | I  | 404.876 | Ti | II | 316.122 | Ti | II | 454.962 |
| Ni | II | 220.672 | Ti | II | 316.177 | Ti | II | 457.198 |
| Ni | II | 221.648 | Ti | II | 316.257 | Ti | I  | 498.173 |
| Ni | II | 222.296 | Ti | II | 316.853 | Ti | I  | 499.107 |
| Ni | II | 226.446 | Ti | II | 319.088 | Ti | I  | 499.951 |
| Ni | II | 227.021 | Ti | II | 320.254 | Ti | I  | 500.721 |
| Ni | II | 227.877 | Ti | II | 321.706 |    |    |         |
| Ni | II | 230.300 | Ti | II | 322.284 |    |    |         |
